# Supplementary material for: The Association of dp-ucMGP with Cardiovascular Morbidity and Decreased Renal Function in Diabetic Chronic Kidney Disease
Source: PubMed Central journal article supplement (PMC7504709; doi:10.3390/ijms21176035), 2020-08-21
Supplement: ijms-21-06035-s001.pdf [file ijms-21-06035-s001.pdf]

**Supplementary Table S1.** Univariate Cox proportional hazard analysis in 300 bootstrap samples, showing the association between high dp-ucMGP and the composite renal outcome of at least 30% eGFR reduction or progression to ESRD.

| <b>≥30% eGFR reduction or progression to ESRD</b> |              |                         |              |
|---------------------------------------------------|--------------|-------------------------|--------------|
|                                                   | Hazard Ratio | 95% Confidence Interval | P            |
| Dp-ucMGP ≥656pM                                   | 2.02         | 1.24-3.67               | <b>0.003</b> |
